# Supplementary material
Source: bioRxiv or medRxiv preprint supplement (https://www.medrxiv.org/highwire/filestream/85241/field_highwire_adjunct_files/0/2020.06.08.20120584-1.pdf)
Supplement: Supplementary file [file 2020.06.08.20120584-1.pdf]

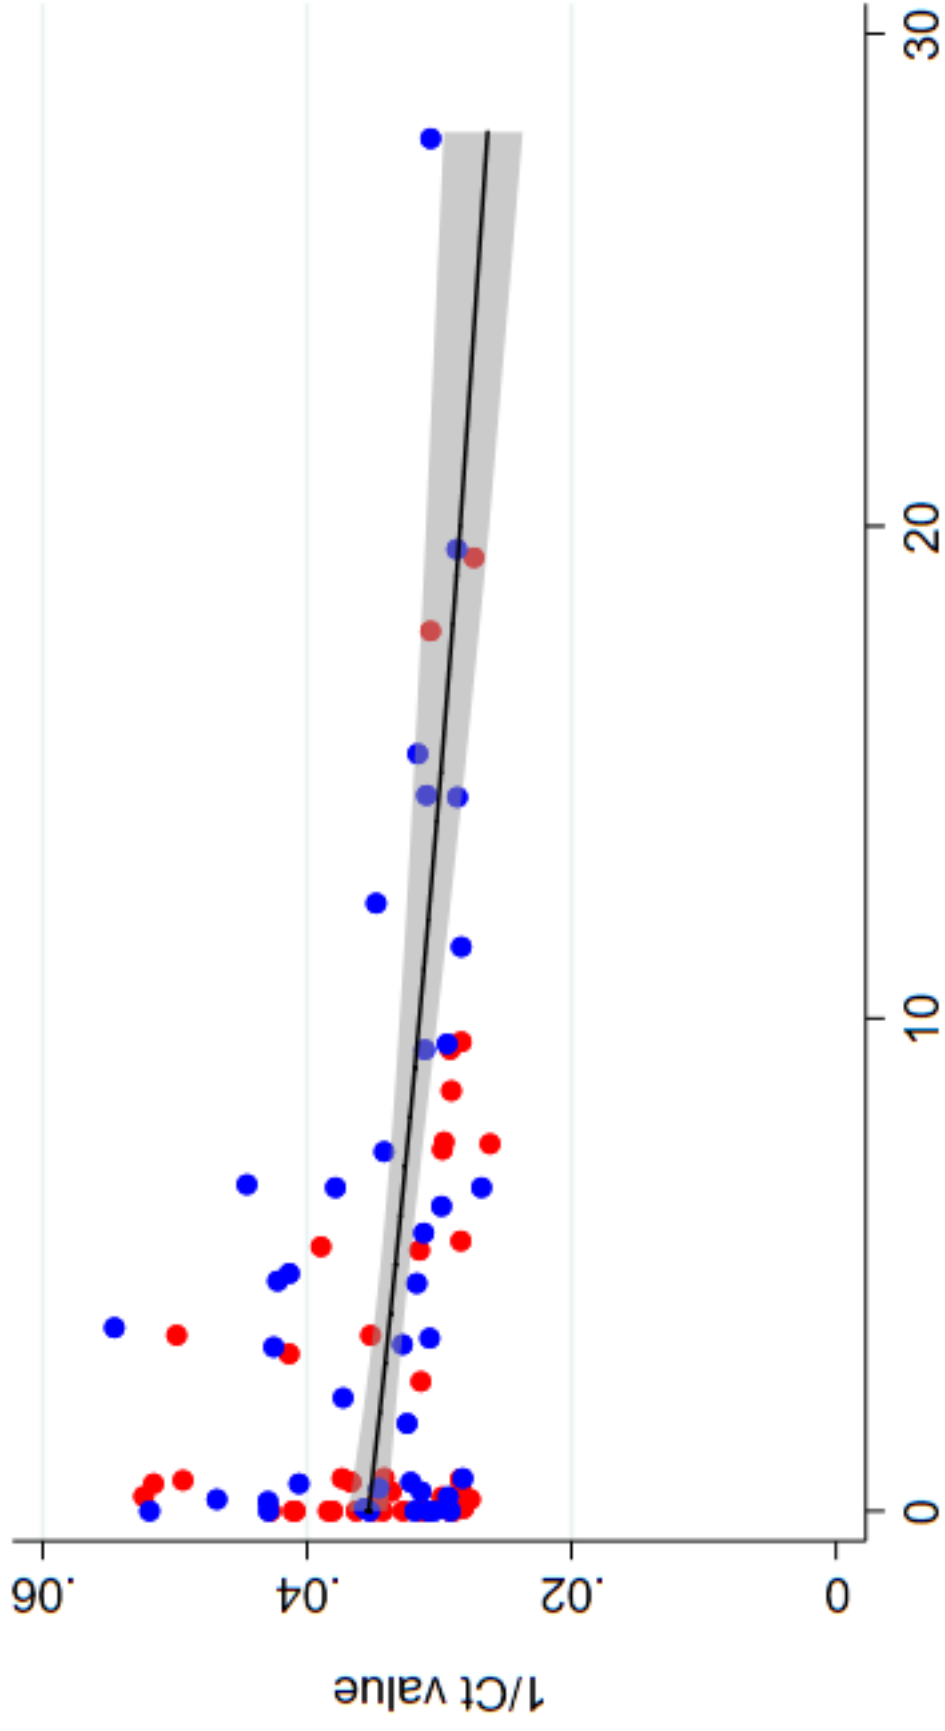

Days since first SARS-CoV-2 PCR positive swab

- Positive at first swab
- Positive during follow-up
- 95% Confidence interval
- Fitted values
